# Supplementary material
Source: publisher site journal article supplement (https://www.degruyterbrill.com/publication/journal_key/PJBR/downloadAsset/PJBR_SI_CFP_template.docx)
Supplement: Supplementary file 1 [file PJBR_SI_CFP_template.docx]

PALADYN, Journal of Behavioral Robotics DE GRUYTER

Call for Papers **SPECIAL ISSUE on …..**

**GUEST EDITORS**

# Name, Affiliation

# Name, Affiliation

**ADVISORY EDITOR**

# Name, Affiliation

**DESCRIPTION**

*……*

This thematic special issue in [*Paladyn, Journal of Behavioral Robotics*](https://www.degruyter.com/pjbr) is devoted to the publication of …..

This thematic special issue in [*Paladyn, Journal of Behavioral Robotics*](https://www.degruyter.com/pjbr) is based originally on ….. held … but also open to external authors!

Contributions to the Special Issue may address (but are not limited) to the following aspects:

- ……
- ……

Authors are requested to submit their full research papers complying the general scope of the journal. The submitted papers will undergo the standard peer-review process before they can be accepted. Notification of acceptance will be communicated as we progress with the review process.

**HOW TO SUBMIT**

Before submission authors should carefully read the [Instruction for Authors](https://www.degruyter.com/publication/journal_key/PJBR/downloadAsset/PJBR_Instructions%20for%20Authors.pdf).

Manuscripts can be written in TeX, LaTeX (strongly recommended) - the journal’s [LATEX template](https://www.degruyter.com/publication/journal_key/PJBR/downloadAsset/PJBR_LaTeX%20Template.zip). Please note that we do not accept papers in Plain TEX format. Text files can be also submitted as standard DOCUMENT (.DOC) which is acceptable if the submission in LATEX is not possible. **For an initial submission, the authors are strongly advised to upload their entire manuscript, including tables and figures, as a single PDF file.**

All submissions to the Special Issue must be made electronically via online submission system Editorial Manager: [www.editorialmanager.com/paladyn/](http://www.editorialmanager.com/paladyn/)

All manuscripts will undergo the standard peer-review process (single blind, at least two independent reviewers). When entering your submission via online submission system please choose the option “*SI on ….”*.

Submission of a manuscript implies that the work described has not been published before as a whole or as a part in any medium by the authors or anyone else and it is not under consideration for publication elsewhere. In case an original paper was published as part of conference proceedings it is expected that a submission to this Special Issue will be extended by a minimum of 60%. Adequate authors' statements and reference to the original source should be included in a manuscript. For more details please see [Authors Statements](https://www.degruyter.com/publication/journal_key/PJBR/downloadAsset/PJBR_Authors%20Statements.pdf) and [Data Sharing Policy](https://www.degruyter.com/publication/journal_key/PJBR/downloadAsset/PJBR_Data%20Sharing%20Policy.pdf) documents available in the Supplementary Materials section at the journal website.

**The deadline for submissions is ….** but individual papers will be reviewed and published online on an ongoing basis.

Contributors to the Special Issue will benefit from:

- **indexation in SCOPUS**
- **NO submission FEES;** voluntary publication fees*
- constructive peer-review provided by experts in the field
- **no space constraints**
- convenient, web-based paper submission and tracking system – Editorial Manager
- quick online publication upon completing the publishing process (**continuous publication model**)
- better visibility due to **Open Access**
- **liberal policies on copyrights** (authors retain copyrights) and on self-archiving (no embargo periods) **
- **long-term preservation** of the content (articles archived in Portico)
- promotion of published papers to readers and citers

*The journal is subject to a VOLUNTARY [Article Processing Charge](https://www.degruyter.com/publication/journal_key/PJBR/downloadAsset/PJBR_Article%20Processing%20Charges.pdf) (APC) which only accounts for accepted manuscripts. There are no submission fees. The journal always reserves a space for free publication for authors who have no funds. Nevertheless, any financial support will be greatly appreciated!

** The use of article will be governed by the Creative-Commons Attribution license (CC-BY) - [License to Publish](https://www.degruyter.com/publication/journal_key/PJBR/downloadAsset/PJBR_License%20to%20Publish.pdf) document (in PDF)

We are looking forward to your submission!

In case of any questions please contact **Ms. Katarzyna Gajewska**, Managing Editor of Paladyn. JBR, [Katarzyna.Gajewska@degruyter.com](mailto:Katarzyna.Gajewska@degruyter.com).
